# Supplementary material for: OsFLZ2 interacts with OsMADS51 to fine-tune rice flowering time
Source: Oxford University Press journal article supplement (doi:10.1242/dev.200862), 2022-12-14
Supplement: dev200862supp.pdf [file dev200862supp.pdf]

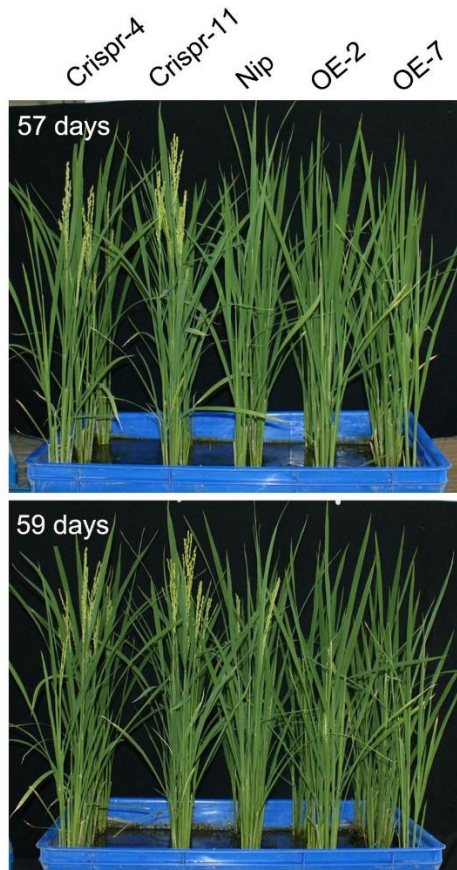

NLD (from mid-April to July, GuangZhou)

**Fig. S1.** Flowering phenotypes of Nipponbare and the *OsFLZ2* transgenic plants under natural long-day conditions (NLD, from mid-April to July, Guangzhou).

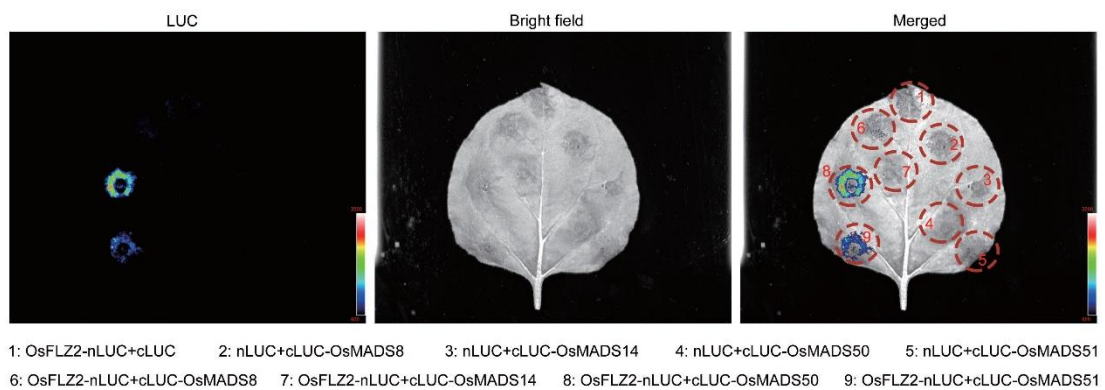

**Fig. S2.** The LCI assay showing the interaction of *OsFLZ2* and *OsMADS8/14/50/51* in the leaves of *N. benthamiana*.

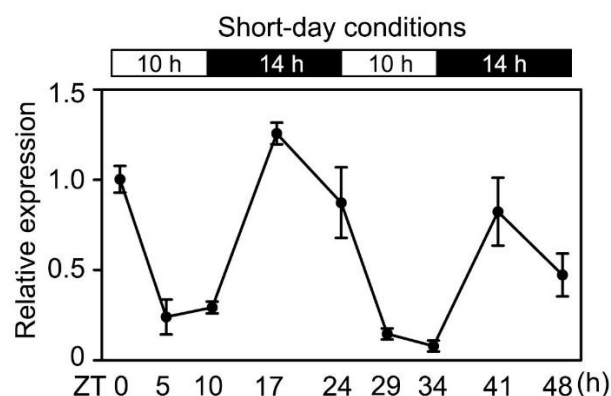

**Fig. S3.** qRT-PCR analysis of the diurnal expression pattern of *OsFLZ2* under short-day conditions (10 h light). Penultimate leaves were collected at the indicated time points during a 48-h period of 14-d-old *Nipponbare* plants. *Ubiquitin* gene was used as an internal control. The expression level was set as 1.0 at ZT0. Values are means  $\pm$ SD ( $n = 3$ ). The white bars and black bars at the top represent the light and dark periods, respectively. ZT, Zeitgeber time.

**Table S1.** Complete list of potential interactors of *OsFLZ2* identified in IP-MS assay.

[Click here to download Table S1](#)

**Table S2.** Primers used in this study

[Click here to download Table S2](#)
